# Supplementary material
Source: PubMed Central journal article supplement (PMC10502417)
Supplement: NIHMS689046-supplement-1.pdf [file NIHMS689046-supplement-1.pdf]

**Supplemental Material**

**Rivnak, A. J. et al. "A Fully-automated Six-Plex Single Molecule Immunoassay for Measuring Cytokines in Blood"**

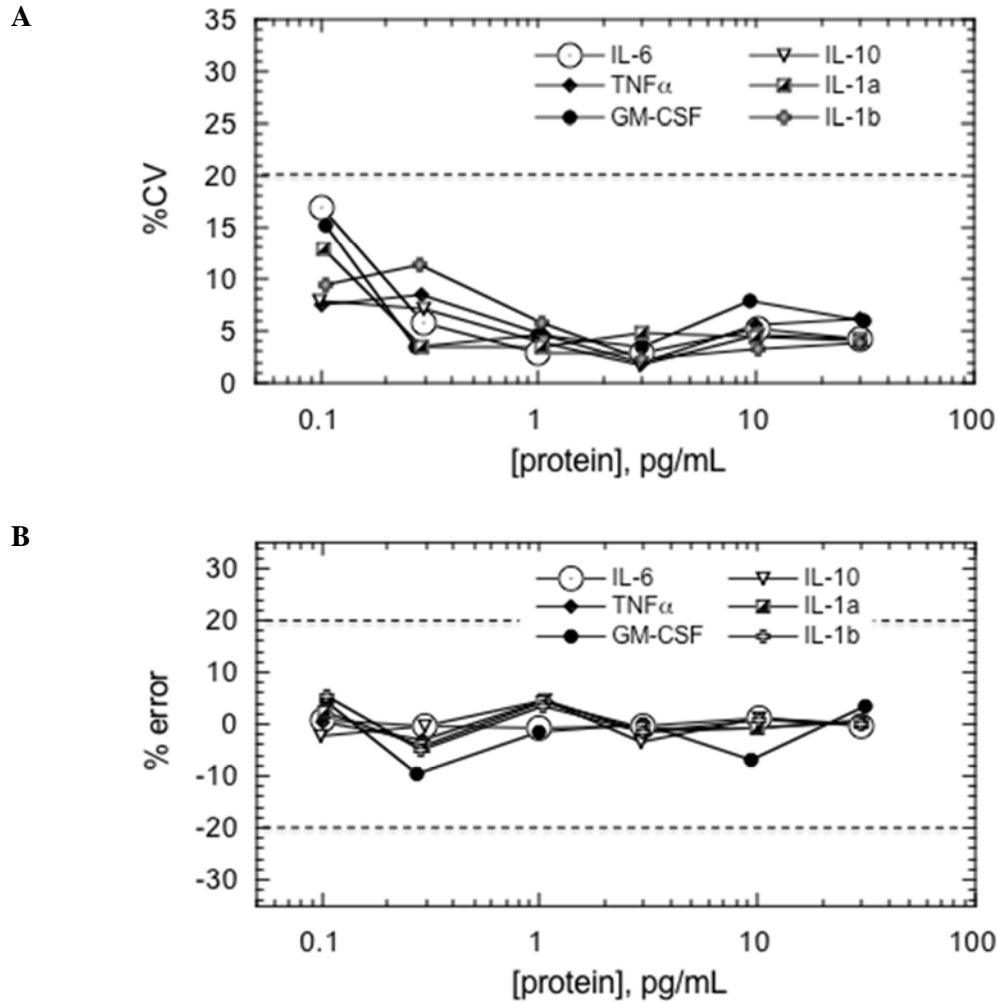

**Figure S1.** Plots of concentration of six cytokines spiked into bovine serum against: A) the imprecision (in %CV) in concentrations determined by reading back the calibrators off the calibration curve; and, B) the inaccuracy (in % error) in concentration value by reading back the calibrators off the calibration curve. These plots are based on the data from the three calibration runs presented in Figure 2 and Tables S1-S3.

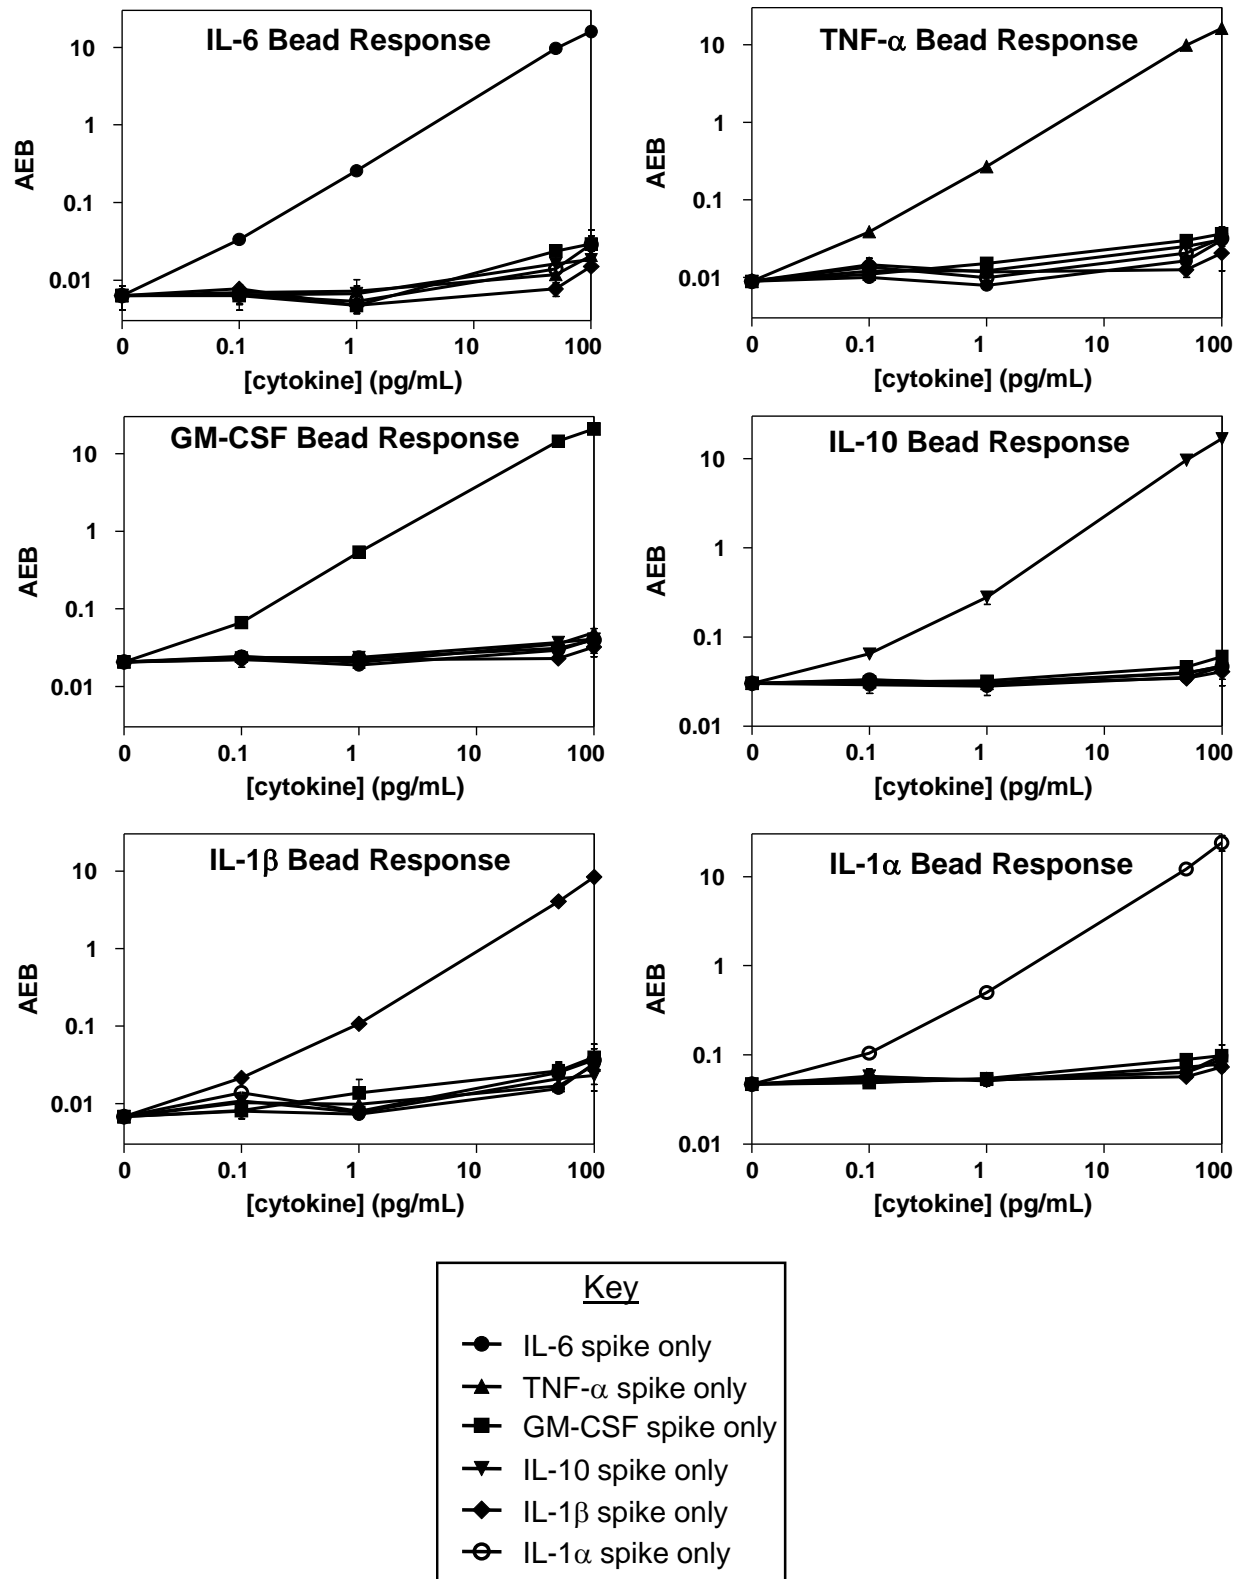

**Figure S2.** Plots of AEB against concentration of cytokine for six different specific bead types in a 6-plex Simoa assay. In these experiments, individual cytokines were separately spiked into bovine serum from 0 to 100 pg/mL to assess cross-reactivity.

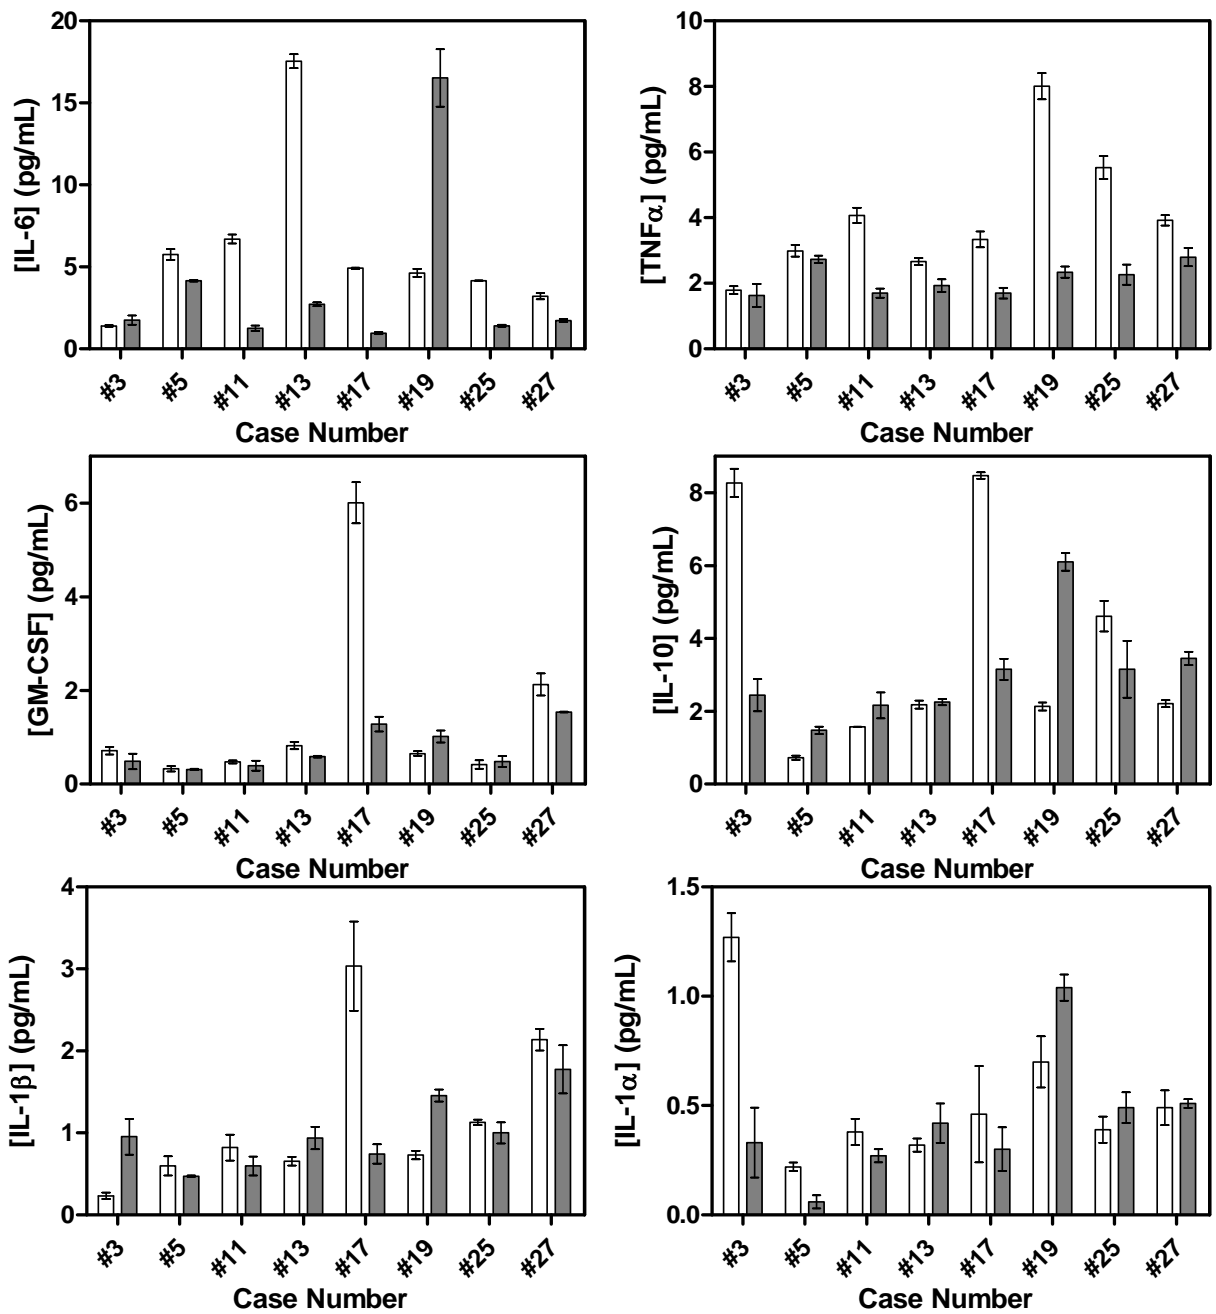

**Figure S3.** Plots of the concentrations of 6 cytokines in the plasma of eight CD patients before treatment with anti-TNF- $\alpha$  therapy (white bar) and 12 weeks after therapy was started (grey bar). Patients were anti-TNF- $\alpha$  naïve, except Case #19 who had previously been treated with infliximab. Error bars are based on one standard deviation of triplicate measurements.

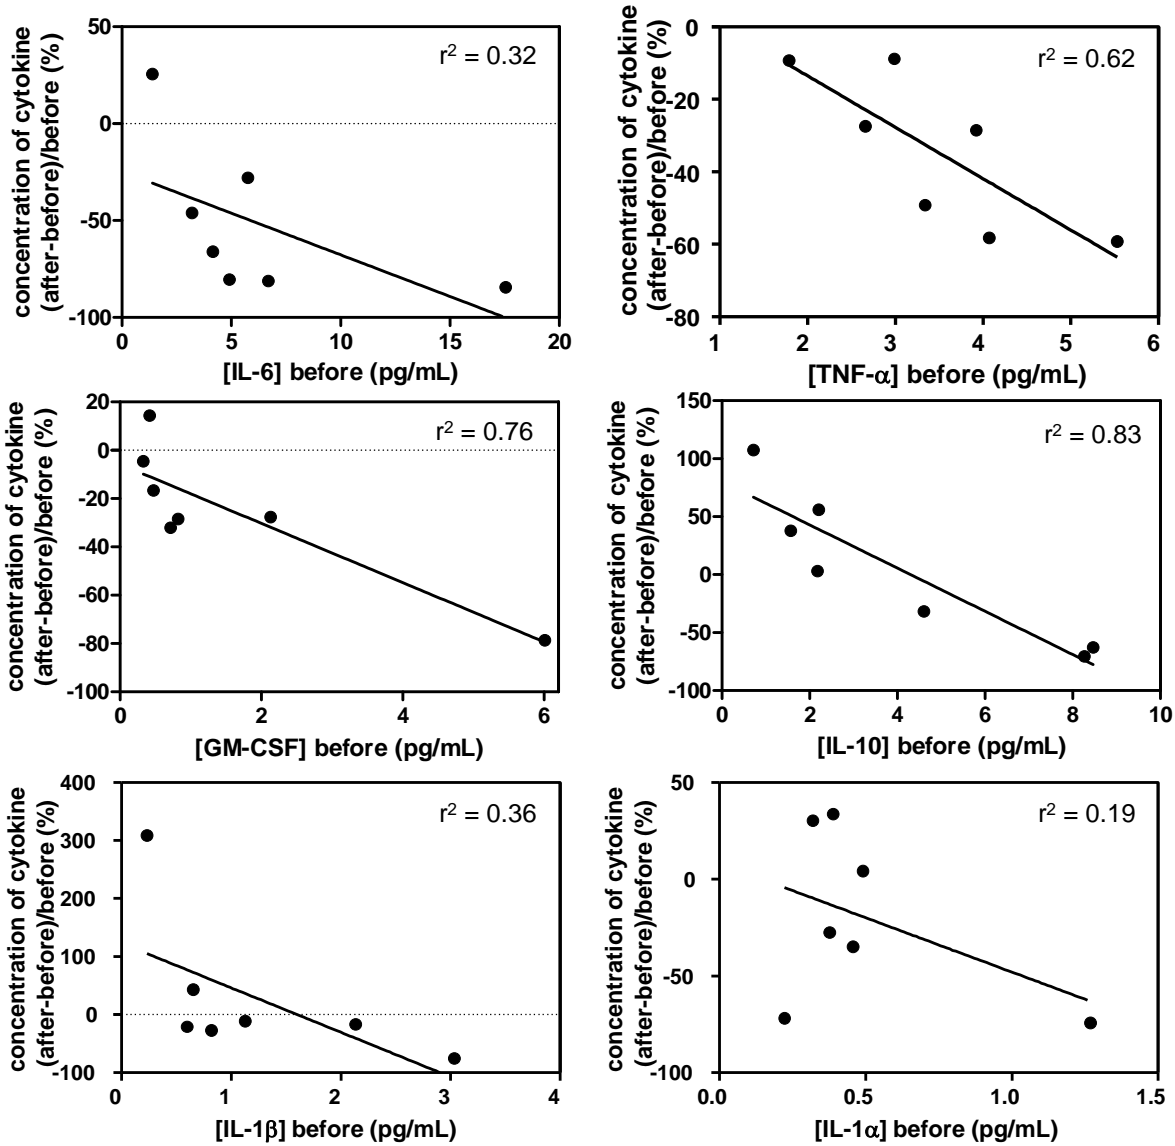

**Figure S4.** Plots determined using multiplex Simoa of the percentage change in concentration of 6 cytokines in the plasma of CD patients against the concentration of the cytokine before treatment with anti-TNF- $\alpha$  drug. The correlation of each data set is provided.

**Table S1.** AEB, standard deviations and CVs for 6 cytokines spiked into calibrator samples generated during the first of three runs using a 6-plex Simoa assay on the fully-automated system.

| [cytokine]<br>(pg/mL) | IL-6   |        |       | TNF- $\alpha$ |        |       | GM-CSF |       |      |
|-----------------------|--------|--------|-------|---------------|--------|-------|--------|-------|------|
|                       | AEB    | SD     | CV    | AEB           | SD     | CV    | AEB    | SD    | CV   |
| 30                    | 10.596 | 0.340  | 3.2%  | 4.493         | 0.024  | 5.4%  | 6.212  | 0.257 | 4.1% |
| 10                    | 4.294  | 0.200  | 4.7%  | 1.622         | 0.087  | 5.3%  | 2.478  | 0.164 | 6.6% |
| 3                     | 1.397  | 0.038  | 2.7%  | 0.513         | 0.010  | 1.9%  | 0.930  | 0.028 | 3.1% |
| 1                     | 0.491  | 0.014  | 2.8%  | 0.192         | 0.008  | 4.3%  | 0.345  | 0.014 | 4.0% |
| 0.3                   | 0.160  | 0.008  | 5.2%  | 0.0622        | 0.0043 | 6.9%  | 0.118  | 0.003 | 2.7% |
| 0.1                   | 0.0618 | 0.0086 | 13.9% | 0.0287        | 0.0013 | 4.7%  | 0.061  | 0.006 | 9.3% |
| 0                     | 0.0099 | 0.0015 | 15.2% | 0.0106        | 0.0019 | 17.9% | 0.021  | 0.002 | 9.7% |

  

| [cytokine]<br>(pg/mL) | IL-10  |        |       | IL-1 $\beta$ |        |       | IL-1 $\alpha$ |        |      |
|-----------------------|--------|--------|-------|--------------|--------|-------|---------------|--------|------|
|                       | AEB    | SD     | CV    | AEB          | SD     | CV    | AEB           | SD     | CV   |
| 30                    | 6.668  | 0.240  | 3.6%  | 7.483        | 0.263  | 3.5%  | 9.178         | 0.296  | 3.2% |
| 10                    | 2.537  | 0.109  | 4.3%  | 2.742        | 0.114  | 4.2%  | 3.516         | 0.104  | 3.0% |
| 3                     | 0.785  | 0.014  | 1.7%  | 0.862        | 0.040  | 4.6%  | 1.124         | 0.024  | 2.2% |
| 1                     | 0.305  | 0.011  | 3.6%  | 0.311        | 0.011  | 3.4%  | 0.430         | 0.022  | 5.1% |
| 0.3                   | 0.104  | 0.006  | 5.6%  | 0.0942       | 0.003  | 3.1%  | 0.149         | 0.012  | 8.3% |
| 0.1                   | 0.0489 | 0.0022 | 4.4%  | 0.0412       | 0.0037 | 9.1%  | 0.0804        | 0.0039 | 4.8% |
| 0                     | 0.0213 | 0.0027 | 12.8% | 0.0122       | 0.0016 | 13.3% | 0.0387        | 0.0035 | 9.0% |

**Table S2.** AEB, standard deviations and CVs for 6 cytokines spiked into calibrator samples generated during the second of three runs using a 6-plex Simoa assay on the fully-automated system.

| [cytokine]<br>(pg/mL) | IL-6   |        |       | TNF- $\alpha$ |        |       | GM-CSF |        |       |
|-----------------------|--------|--------|-------|---------------|--------|-------|--------|--------|-------|
|                       | AEB    | SD     | CV    | AEB           | SD     | CV    | AEB    | SD     | CV    |
| 30                    | 13.265 | 0.099  | 0.7%  | 4.913         | 0.040  | 0.8%  | 8.043  | 0.083  | 1.0%  |
| 10                    | 5.260  | 0.142  | 2.7%  | 1.174         | 0.067  | 3.9%  | 3.174  | 0.052  | 1.6%  |
| 3                     | 1.665  | 0.159  | 9.6%  | 0.562         | 0.013  | 2.3%  | 1.125  | 0.039  | 3.4%  |
| 1                     | 0.597  | 0.019  | 3.1%  | 0.205         | 0.009  | 4.4%  | 0.404  | 0.023  | 5.7%  |
| 0.3                   | 0.209  | 0.014  | 6.8%  | 0.072         | 0.005  | 7.2%  | 0.153  | 0.011  | 7.0%  |
| 0.1                   | 0.0735 | 0.0075 | 10.2% | 0.0312        | 0.0010 | 3.2%  | 0.0625 | 0.0022 | 3.5%  |
| 0                     | 0.0127 | 0.0018 | 14.1% | 0.011         | 0.0018 | 16.3% | 0.0212 | 0.0026 | 12.4% |

  

| [cytokine]<br>(pg/mL) | IL-10  |        |       | IL-1 $\beta$ |        |       | IL-1 $\alpha$ |        |       |
|-----------------------|--------|--------|-------|--------------|--------|-------|---------------|--------|-------|
|                       | AEB    | SD     | CV    | AEB          | SD     | CV    | AEB           | SD     | CV    |
| 30                    | 5.727  | 0.104  | 1.8%  | 7.810        | 0.069  | 0.9%  | 8.777         | 0.180  | 2.0%  |
| 10                    | 2.080  | 0.065  | 3.1%  | 2.785        | 0.089  | 3.2%  | 3.219         | 0.098  | 3.0%  |
| 3                     | 0.679  | 0.027  | 4.0%  | 0.943        | 0.024  | 2.5%  | 1.108         | 0.023  | 2.1%  |
| 1                     | 0.251  | 0.008  | 3.3%  | 0.320        | 0.012  | 3.7%  | 0.403         | 0.012  | 3.1%  |
| 0.3                   | 0.090  | 0.002  | 2.3%  | 0.111        | 0.004  | 4.0%  | 0.156         | 0.018  | 11.8% |
| 0.1                   | 0.0434 | 0.0032 | 7.3%  | 0.0425       | 0.0049 | 11.6% | 0.0750        | 0.0017 | 2.3%  |
| 0                     | 0.0220 | 0.0026 | 11.6% | 0.0117       | 0.0014 | 12.0% | 0.0362        | 0.0039 | 10.9% |

**Table S3.** AEB, standard deviations and CVs for 6 cytokines spiked into calibrator samples generated during the third of three runs using a 6-plex Simoa assay on the fully-automated system.

| [cytokine]<br>(pg/mL) | IL-6   |        |       | TNF- $\alpha$ |        |       | GM-CSF |        |       |
|-----------------------|--------|--------|-------|---------------|--------|-------|--------|--------|-------|
|                       | AEB    | SD     | CV    | AEB           | SD     | CV    | AEB    | SD     | CV    |
| 30                    | 10.975 | 0.308  | 2.8%  | 4.584         | 0.058  | 1.3%  | 6.796  | 0.258  | 3.8%  |
| 10                    | 4.132  | 0.078  | 1.9%  | 1.514         | 0.070  | 4.6%  | 2.496  | 0.147  | 5.9%  |
| 3                     | 1.357  | 0.085  | 6.3%  | 0.552         | 0.019  | 3.3%  | 0.996  | 0.058  | 5.8%  |
| 1                     | 0.511  | 0.011  | 2.2%  | 0.198         | 0.012  | 5.9%  | 0.384  | 0.006  | 1.5%  |
| 0.3                   | 0.172  | 0.008  | 4.7%  | 0.070         | 0.005  | 6.9%  | 0.129  | 0.004  | 3.4%  |
| 0.1                   | 0.0661 | 0.0047 | 7.1%  | 0.0328        | 0.0004 | 1.4%  | 0.0578 | 0.0019 | 3.3%  |
| 0                     | 0.0131 | 0.0033 | 25.3% | 0.0140        | 0.0018 | 12.9% | 0.0227 | 0.0026 | 11.5% |

  

| [cytokine]<br>(pg/mL) | IL-10  |        |      | IL-1 $\beta$ |        |       | IL-1 $\alpha$ |        |      |
|-----------------------|--------|--------|------|--------------|--------|-------|---------------|--------|------|
|                       | AEB    | SD     | CV   | AEB          | SD     | CV    | AEB           | SD     | CV   |
| 30                    | 6.217  | 0.213  | 3.4% | 7.079        | 0.161  | 2.3%  | 7.354         | 0.149  | 2.0% |
| 10                    | 2.173  | 0.083  | 3.8% | 2.388        | 0.093  | 3.9%  | 2.645         | 0.079  | 3.0% |
| 3                     | 0.748  | 0.025  | 3.3% | 0.878        | 0.031  | 3.5%  | 0.961         | 0.025  | 2.6% |
| 1                     | 0.266  | 0.003  | 1.0% | 0.317        | 0.015  | 4.8%  | 0.361         | 0.005  | 1.5% |
| 0.3                   | 0.103  | 0.005  | 4.6% | 0.105        | 0.006  | 5.3%  | 0.145         | 0.009  | 6.4% |
| 0.1                   | 0.0499 | 0.0024 | 4.8% | 0.0435       | 0.0002 | 0.4%  | 0.0816        | 0.0026 | 3.2% |
| 0                     | 0.0247 | 0.0023 | 9.4% | 0.0137       | 0.0017 | 12.5% | 0.0512        | 0.0039 | 7.6% |

**Table S4.** Limit of detection (LOD) values of cytokines in the automated 6-plex Simoa assay.

| Cytokine      | Day 1 LOD<br>(fg/mL) | Day 2 LOD<br>(fg/mL) | Day 3 LOD<br>(fg/mL) | Average LOD<br>(fg/mL) |
|---------------|----------------------|----------------------|----------------------|------------------------|
| IL-6          | 7.2                  | 7.4                  | 15.7                 | 10.1                   |
| TNF- $\alpha$ | 26.3                 | 22.3                 | 24.0                 | 24.2                   |
| GM-CSF        | 13.3                 | 15.9                 | 18.6                 | 15.9                   |
| IL-10         | 24.7                 | 29.9                 | 23.2                 | 25.9                   |
| IL-1 $\beta$  | 14.0                 | 11.3                 | 14.3                 | 13.2                   |
| IL-1 $\alpha$ | 20.9                 | 25.3                 | 31.8                 | 26.0                   |

**Table S5.** Inter-run precision of AEB values for 6 cytokines over the three runs presented

| [cytokine]<br>(pg/mL) | IL-6 | TNF- $\alpha$ | GM-CSF | IL-10 | IL-1 $\beta$ | IL-1 $\alpha$ |
|-----------------------|------|---------------|--------|-------|--------------|---------------|
|                       | CV   | CV            | CV     | CV    | CV           | CV            |
| 30                    | 12%  | 5%            | 13%    | 8%    | 5%           | 11%           |
| 10                    | 13%  | 6%            | 15%    | 11%   | 8%           | 14%           |
| 3                     | 11%  | 5%            | 10%    | 7%    | 5%           | 8%            |
| 1                     | 10%  | 3%            | 8%     | 10%   | 1%           | 9%            |
| 0.3                   | 14%  | 8%            | 13%    | 8%    | 8%           | 4%            |
| 0.1                   | 9%   | 7%            | 4%     | 7%    | 3%           | 4%            |
| 0                     | 15%  | 15%           | 4%     | 8%    | 8%           | 19%           |

**Table S6.** Concentrations (in pg/mL) of plasma samples from patients with Crohn's disease and control healthy subjects. Key: CD before = Crohn's Disease patient before treatment; CD after = Crohn's Disease patient after treatment.

| Case | Type      | IL-6  |      |       | TNF- $\alpha$ |      |       | GM-CSF |      |       | IL-10 |      |       | IL-1 $\beta$ |      |       | IL-1 $\alpha$ |      |       |
|------|-----------|-------|------|-------|---------------|------|-------|--------|------|-------|-------|------|-------|--------------|------|-------|---------------|------|-------|
|      |           | Conc  | SD   | CV    | Conc          | SD   | CV    | Conc   | SD   | CV    | Conc  | SD   | CV    | Conc         | SD   | CV    | Conc          | SD   | CV    |
| #3   | CD before | 1.40  | 0.04 | 2.7%  | 1.79          | 0.12 | 6.8%  | 0.71   | 0.08 | 11.3% | 8.27  | 0.39 | 4.7%  | 0.23         | 0.04 | 16.8% | 1.27          | 0.11 | 8.5%  |
| #3   | CD after  | 1.76  | 0.29 | 16.3% | 1.63          | 0.35 | 21.4% | 0.48   | 0.17 | 34.7% | 2.44  | 0.44 | 18.0% | 0.95         | 0.22 | 22.9% | 0.33          | 0.16 | 48%   |
| #5   | CD before | 5.76  | 0.33 | 5.7%  | 2.99          | 0.18 | 5.9%  | 0.33   | 0.06 | 18.0% | 0.72  | 0.06 | 8.6%  | 0.60         | 0.12 | 19.4% | 0.22          | 0.02 | 9.7%  |
| #5   | CD after  | 4.15  | 0.04 | 1.0%  | 2.73          | 0.12 | 4.5%  | 0.31   | 0.01 | 3.9%  | 1.48  | 0.10 | 6.8%  | 0.47         | 0.01 | 1.7%  | 0.06          | 0.03 | 51%   |
| #7   | CD before | 9.72  | 0.56 | 5.8%  | 4.03          | 0.02 | 0.5%  | 0.33   | 0.09 | 26.0% | 2.16  | 0.07 | 3.3%  | 0.63         | 0.09 | 14.2% | 0.36          | 0.06 | 17%   |
| #8   | CD before | 12.65 | 0.42 | 3.3%  | 22.28         | 1.50 | 6.7%  | 19.0   | 0.53 | 2.8%  | 67.3  | 2.4  | 3.5%  | 47.2         | 1.69 | 3.6%  | 14.7          | 0.47 | 3.2%  |
| #11  | CD before | 6.70  | 0.28 | 4.2%  | 4.07          | 0.23 | 5.8%  | 0.47   | 0.03 | 6.5%  | 1.57  | 0.01 | 0.4%  | 0.82         | 0.16 | 19.4% | 0.38          | 0.06 | 17%   |
| #11  | CD after  | 1.26  | 0.17 | 13.4% | 1.70          | 0.14 | 8.2%  | 0.39   | 0.11 | 26.7% | 2.16  | 0.36 | 16.6% | 0.60         | 0.11 | 19.0% | 0.27          | 0.03 | 10%   |
| #13  | CD before | 17.55 | 0.42 | 2.4%  | 2.66          | 0.11 | 4.0%  | 0.82   | 0.08 | 9.8%  | 2.18  | 0.11 | 5.2%  | 0.66         | 0.05 | 8.3%  | 0.32          | 0.03 | 9.0%  |
| #13  | CD after  | 2.73  | 0.12 | 4.5%  | 1.93          | 0.19 | 9.7%  | 0.59   | 0.02 | 3.0%  | 2.25  | 0.09 | 4.1%  | 0.94         | 0.14 | 14.6% | 0.42          | 0.09 | 23%   |
| #15  | CD before | 8.43  | 0.29 | 3.4%  | 5.10          | 0.31 | 6.1%  | 0.94   | 0.05 | 5.1%  | 1.91  | 0.11 | 5.6%  | 0.87         | 0.04 | 4.6%  | 0.49          | 0.16 | 34%   |
| #17  | CD before | 4.92  | 0.04 | 0.8%  | 3.34          | 0.24 | 7.3%  | 6.01   | 0.44 | 7.4%  | 8.47  | 0.09 | 1.0%  | 3.03         | 0.54 | 17.9% | 0.46          | 0.22 | 48%   |
| #17  | CD after  | 0.96  | 0.07 | 7.1%  | 1.70          | 0.16 | 9.4%  | 1.28   | 0.16 | 12.2% | 3.15  | 0.29 | 9.3%  | 0.74         | 0.12 | 15.9% | 0.30          | 0.10 | 35%   |
| #19  | CD before | 4.63  | 0.24 | 5.1%  | 8.01          | 0.40 | 5.0%  | 0.65   | 0.05 | 7.6%  | 2.13  | 0.11 | 5.2%  | 0.73         | 0.05 | 7.2%  | 0.70          | 0.12 | 17%   |
| #19  | CD after  | 16.53 | 1.75 | 10.6% | 2.34          | 0.17 | 7.4%  | 1.02   | 0.13 | 12.7% | 6.10  | 0.24 | 3.9%  | 1.45         | 0.07 | 5.1%  | 1.04          | 0.06 | 5.4%  |
| #21  | CD before | 46.80 | 1.80 | 3.8%  | 5.21          | 0.13 | 2.4%  | 0.42   | 0.09 | 22.6% | 6.04  | 0.29 | 4.7%  | 0.77         | 0.00 | 0.2%  | 0.22          | 0.05 | 23%   |
| #23  | CD before | 9.94  | 0.35 | 3.5%  | 6.98          | 0.11 | 1.6%  | 1.85   | 0.15 | 8.2%  | 3.45  | 0.18 | 5.2%  | 0.60         | 0.06 | 10.3% | 0.25          | 0.08 | 32%   |
| #25  | CD before | 4.16  | 0.01 | 0.3%  | 5.53          | 0.35 | 6.3%  | 0.42   | 0.09 | 21.8% | 4.61  | 0.42 | 9.0%  | 1.13         | 0.03 | 3.0%  | 0.39          | 0.06 | 16%   |
| #25  | CD after  | 1.41  | 0.06 | 3.9%  | 2.26          | 0.31 | 13.9% | 0.48   | 0.12 | 24.3% | 3.15  | 0.78 | 24.7% | 1.00         | 0.13 | 12.9% | 0.52          | 0.08 | 16%   |
| #27  | CD before | 3.21  | 0.19 | 5.9%  | 3.92          | 0.16 | 4.1%  | 2.13   | 0.23 | 11.0% | 2.21  | 0.10 | 4.6%  | 2.14         | 0.13 | 6.2%  | 0.49          | 0.08 | 17%   |
| #27  | CD after  | 1.73  | 0.09 | 5.2%  | 2.80          | 0.28 | 10.2% | 1.54   | 0.01 | 0.5%  | 3.45  | 0.18 | 5.1%  | 1.77         | 0.29 | 16.5% | 0.51          | 0.02 | 4.2%  |
| #29  | CD before | 3.45  | 0.09 | 2.5%  | 4.15          | 0.17 | 4.0%  | 0.38   | 0.03 | 7.6%  | 1.53  | 0.16 | 10.2% | 0.78         | 0.08 | 10.8% | 0.49          | 0.07 | 14%   |
| #31  | CD before | 5.49  | 0.10 | 1.7%  | 2.00          | 0.06 | 3.1%  | 0.39   | 0.00 | 0.2%  | 0.99  | 0.12 | 11.8% | 0.77         | 0.06 | 7.3%  | 0.22          | 0.05 | 25%   |
| #35  | CD before | 7.82  | 0.43 | 5.5%  | 2.77          | 0.04 | 1.4%  | 0.58   | 0.04 | 6.2%  | 2.61  | 0.13 | 4.9%  | 0.86         | 0.06 | 6.8%  | 1.38          | 0.21 | 16%   |
| #4   | Control   | 1.01  | 0.08 | 7.7%  | 3.64          | 0.22 | 6.1%  | 0.29   | 0.04 | 13.2% | 1.57  | 0.08 | 5.3%  | 1.14         | 0.09 | 7.5%  | 0.33          | 0.02 | 5.1%  |
| #6   | Control   | 2.53  | 0.14 | 5.7%  | 5.76          | 0.06 | 1.0%  | 2.23   | 0.03 | 1.1%  | 7.11  | 0.16 | 2.2%  | 2.51         | 0.14 | 5.4%  | 3.45          | 0.20 | 5.7%  |
| #9   | Control   | 5.33  | 0.21 | 3.9%  | 3.81          | 0.14 | 3.7%  | 0.43   | 0.05 | 12.2% | 3.46  | 0.13 | 3.6%  | 0.61         | 0.04 | 6.5%  | 0.29          | 0.01 | 2.8%  |
| #10  | Control   | 1.45  | 0.06 | 3.9%  | 3.47          | 0.32 | 9.2%  | 0.26   | 0.01 | 3.9%  | 1.93  | 0.20 | 10.2% | 0.79         | 0.04 | 4.4%  | 0.27          | 0.08 | 28.6% |
| #12  | Control   | 5.53  | 0.13 | 2.4%  | 5.53          | 0.11 | 2.0%  | 0.43   | 0.07 | 16.6% | 5.45  | 0.24 | 4.4%  | 1.37         | 0.02 | 1.2%  | 1.77          | 0.02 | 0.9%  |
| #14  | Control   | 1.64  | 0.10 | 6.1%  | 3.80          | 0.04 | 1.0%  | 0.47   | 0.05 | 10.5% | 2.90  | 0.08 | 2.6%  | 0.61         | 0.05 | 8.7%  | 0.46          | 0.24 | 53%   |
| #16  | Control   | 1.96  | 0.13 | 6.5%  | 2.94          | 0.08 | 2.7%  | 0.81   | 0.04 | 4.6%  | 2.72  | 0.08 | 2.9%  | 1.94         | 0.06 | 2.9%  | 2.06          | 0.58 | 28%   |
| #18  | Control   | 6.52  | 0.29 | 4.5%  | 8.34          | 0.40 | 4.8%  | 3.75   | 0.18 | 4.9%  | 9.46  | 0.10 | 1.0%  | 4.74         | 0.35 | 7.3%  | 5.21          | 0.41 | 7.9%  |
| #20  | Control   | 1.33  | 0.02 | 1.5%  | 3.09          | 0.01 | 0.5%  | 0.19   | 0.12 | 60.7% | 5.59  | 0.15 | 2.7%  | 0.59         | 0.22 | 36%   | 0.40          | 0.00 | 0.7%  |
| #22  | Control   | 0.81  | 0.26 | 31.8% | 2.40          | 0.55 | 22.8% | 0.39   | 0.10 | 24.6% | 3.33  | 0.18 | 5.3%  | 0.32         | 0.10 | 33%   | 0.17          | 0.07 | 41%   |
| #24  | Control   | 3.15  | 0.04 | 1.1%  | 6.95          | 0.57 | 8.3%  | 2.58   | 0.04 | 1.6%  | 14.4  | 1.7  | 12.1% | 4.96         | 0.28 | 5.7%  | 3.89          | 0.82 | 21%   |
| #26  | Control   | 2.94  | 0.19 | 6.5%  | 9.45          | 0.59 | 6.3%  | 7.31   | 0.71 | 9.7%  | 7.46  | 0.52 | 7.0%  | 9.38         | 0.77 | 8.2%  | 7.09          | 0.37 | 5.2%  |
| #28  | Control   | 3.64  | 0.13 | 3.5%  | 5.59          | 1.77 | 31.6% | 2.62   | 1.01 | 38.4% | 14.5  | 2.7  | 18.7% | 2.06         | 0.86 | 42%   | 0.27          | 0.06 | 24%   |
| #30  | Control   | 2.17  | 0.10 | 4.8%  | 2.97          | 0.28 | 9.3%  | 0.33   | 0.05 | 16.6% | 3.08  | 1.24 | 40.4% | 0.38         | 0.00 | 1.0%  | 0.32          | 0.17 | 53%   |
| #32  | Control   | 5.35  | 0.36 | 6.7%  | 1.86          | 0.25 | 13.7% | 0.36   | 0.04 | 9.7%  | 2.80  | 0.38 | 13.7% | 0.56         | 0.14 | 25%   | 0.57          | 0.14 | 25%   |
| #36  | Control   | 2.72  | 0.05 | 1.7%  | 3.72          | 0.28 | 7.6%  | 1.36   | 0.09 | 6.9%  | 8.90  | 1.36 | 15.3% | 2.21         | 0.23 | 10.5% | 2.07          | 0.31 | 15%   |

**Table S7.** Mean concentration ( $\pm$  SEM) of 6 cytokines in plasma of CD patients and matched healthy controls. Key: s = means are significantly different; ns = means are not significantly different

| Cytokine      | CD Patients<br>(pg/mL) | Healthy Controls<br>(pg/mL) | P value of <i>t</i> -test |
|---------------|------------------------|-----------------------------|---------------------------|
| IL-6          | 9.5 $\pm$ 2.7          | 3.0 $\pm$ 0.4               | 0.022; s                  |
| TNF- $\alpha$ | 5.3 $\pm$ 1.2          | 4.6 $\pm$ 0.5               | 0.59; ns                  |
| GM-CSF        | 2.2 $\pm$ 1.2          | 1.5 $\pm$ 0.5               | 0.57; ns                  |
| IL-10         | 7.3 $\pm$ 4.1          | 5.9 $\pm$ 1.0               | 0.75; ns                  |
| IL-1 $\beta$  | 3.9 $\pm$ 2.9          | 2.1 $\pm$ 0.6               | 0.56; ns                  |
| IL-1 $\alpha$ | 1.4 $\pm$ 0.9          | 1.8 $\pm$ 0.5               | 0.71; ns                  |

**Table S8.** Summary of percentage changes in cytokine concentrations in the plasma of CD patients before and after treatment with anti-TNF- $\alpha$  drugs, and mean concentrations before and after treatment.

| Case                         | IL-6      |                         | TNF- $\alpha$ |                         | GM-CSF    | IL-10     | IL-1 $\beta$ | IL-1 $\alpha$ |
|------------------------------|-----------|-------------------------|---------------|-------------------------|-----------|-----------|--------------|---------------|
|                              | Multiplex | Singleplex <sup>b</sup> | Multiplex     | Singleplex <sup>b</sup> | Multiplex | Multiplex | Multiplex    | Multiplex     |
| #3                           | +26%      | +20%                    | -9.3%         | -32%                    | -32%      | -71%      | +309%        | -74%          |
| #5                           | -28%      | -32%                    | -8.8%         | -31%                    | -4.6%     | +107%     | -21%         | -72%          |
| #11                          | -81%      | -81%                    | -58%          | -43%                    | -17%      | +38%      | -27%         | -28%          |
| #13                          | -84%      | -89%                    | -27%          | -47%                    | -28%      | +3%       | +43%         | +30%          |
| #17                          | -81%      | -81%                    | -49%          | -73%                    | -79%      | -63%      | -76%         | -35%          |
| #19 <sup>a</sup>             | +257%     | +200%                   | -71%          | -58%                    | +56%      | +187%     | +99%         | +49%          |
| #25                          | -66%      | -71%                    | -59%          | -36%                    | +14%      | -32%      | -11%         | +34%          |
| #27                          | -46%      | -48%                    | -29%          | -43%                    | -28%      | +56%      | -17%         | +4.2%         |
| Mean % change                | -52%      | -55%                    | -34%          | -43%                    | -25%      | +6%       | +29%         | -20%          |
| Mean conc. before<br>(pg/mL) | 6.2       | 7.3                     | 3.5           | 3.2                     | 1.6       | 4.0       | 1.2          | 0.50          |
| Mean conc. after<br>(pg/mL)  | 2.0       | 2.1                     | 2.1           | 1.8                     | 0.73      | 2.6       | 0.93         | 0.34          |

<sup>a</sup> Case #19 was excluded from mean calculations for all cytokines as this patient had previously been treated with anti-TNF- $\alpha$ , contrary to the original study design. This patient did not respond to either drug, as described in ref. 7.

<sup>b</sup> Data taken from ref.7. Case #1 was not retested in this study as sufficient volume of plasma was not available.

**Table S9.** Mean concentration ( $\pm$  SEM) of 6 cytokines in the serum of patients with Type 1 diabetes and healthy controls. Key: s = means are significantly different; ns = means are not significantly different

| Cytokine      | Type 1 diabetics<br>(pg/mL) | Healthy Controls<br>(pg/mL) | P value of <i>t</i> -test |
|---------------|-----------------------------|-----------------------------|---------------------------|
| IL-6          | 4.2 $\pm$ 0.8               | 3.3 $\pm$ 0.6               | 0.29; ns                  |
| TNF- $\alpha$ | 5.9 $\pm$ 1.4               | 2.0 $\pm$ 0.1               | 0.001; s                  |
| GM-CSF        | 1.8 $\pm$ 0.7               | 0.34 $\pm$ 0.05             | 0.009; s                  |
| IL-10         | 12.6 $\pm$ 2.4              | 4.8 $\pm$ 1.4               | 0.007; s                  |
| IL-1 $\beta$  | 2.4 $\pm$ 1.2               | 0.20 $\pm$ 0.05             | 0.020; s                  |
| IL-1 $\alpha$ | 3.0 $\pm$ 1.6               | 0.72 $\pm$ 0.30             | 0.075; ns                 |
